# Altered Resting State Brain Networks and Cognition in Familial Adenomatous Polyposis

<sup>6</sup>Ryan J. Cali -- [rcali@mgh.harvard.edu](mailto:rcali@mgh.harvard.edu)

<sup>1,5</sup>Benjamin C. Nephew, PhD -- [bcnephew@aol.com](mailto:bcnephew@aol.com)

<sup>1</sup>Constance M. Moore, PhD -- [Constance.Moore@umassmed.edu](mailto:Constance.Moore@umassmed.edu)

<sup>1</sup>Serhiy Chumachenko, MD -- [serga.chumachenko@gmail.com](mailto:serga.chumachenko@gmail.com)

<sup>2</sup>Ana Cecilia Sala, PsyD -- [ana.sala@upr.edu](mailto:ana.sala@upr.edu)

<sup>2</sup>Beatriz Cintron, PhD -- [beacintron@yahoo.com](mailto:beacintron@yahoo.com)

<sup>2</sup>Carlos Luciano, MD -- [carlos.luciano1@upr.edu](mailto:carlos.luciano1@upr.edu)

<sup>1,5</sup>Jean A. King, PhD -- [JAKing@WPI.edu](mailto:JAKing@WPI.edu)

<sup>4</sup>Stephen R. Hooper, PhD -- [Stephen\\_hooper@med.unc.edu](mailto:Stephen_hooper@med.unc.edu)

<sup>3</sup>Francis M. Giardiello, MD -- [fgiardi@jhmi.edu](mailto:fgiardi@jhmi.edu)

<sup>2</sup>Marcia Cruz-Correa, MD, PhD -- [Marcia.cruz1@upr.edu](mailto:Marcia.cruz1@upr.edu)

22 1: Department of Psychiatry, UMass Medical School, Worcester, MA

23 2: Department of Medicine, Medical Sciences Campus, University of Puerto Rico School of

24 Medicine, San Juan, PR

25 3: Division of Gastroenterology, School of Medicine, Johns Hopkins University, Baltimore, MD

26 4: Department of Allied Health Sciences, School of Medicine, University of North Carolina-

27 Chapel Hill, NC

28 5: Department of Biology and Biotechnology, Worcester Polytechnic Institute, Worcester, MA

29 6: Department of Neurology, Massachusetts General Hospital and Harvard Medical School,

30 Boston, MA

31

32 Corresponding author contact information:

33 Benjamin Nephew, PhD [bcnephew@aol.com](mailto:bcnephew@aol.com)

34

35 **Abstract**

36 Familial Adenomatous Polyposis (FAP) is an autosomal dominant disorder caused by mutation  
37 of the *APC* gene presenting with numerous colorectal adenomatous polyps and a near 100%  
38 risk of colon cancer. Preliminary research findings from our group indicate that FAP patients  
39 experience significant deficits across many cognitive domains. In the current study, fMRI brain  
40 metrics in a FAP population and matched controls were used to further the mechanistic  
41 understanding of reported cognitive deficits. This research identified and characterized any  
42 possible differences in resting brain networks and associations between neural network  
43 changes and cognition from 34 participants (18 FAP patients, 16 healthy controls). Functional  
44 connectivity analysis was performed using FSL with independent component analysis (ICA) to  
45 identify functional networks. Significant differences between cases and controls were observed  
46 in 8 well-established resting state networks. With the addition of an aggregate cognitive  
47 measure as a covariate, these differences were virtually non-existent, indicating a strong  
48 correlation between cognition and brain activity at the network level. The data indicate robust  
49 and pervasive effects on functional neural network activity among FAP patients and these  
50 effects are likely involved in cognitive deficits associated with this disease.

51

52 (Keywords: Familial Adenomatous Polyposis, fMRI, Resting State Networks, Cognition,

53 Adenomatous Polyposis Coli)

54

55

56

57 **Introduction**

58           Familial Adenomatous Polyposis (FAP) is an autosomal dominant disorder caused by  
59 germline mutations in the APC (adenomatous polyposis coli) gene. This disease presents at  
60 young age with multiple adenomatous polyps in the colorectum and leads to early-onset  
61 cancer. If left untreated, these patient develop colorectal on average by the fourth decade of  
62 life (Fearnhead, Britton, & Bodmer, 2001). The frequency of the disease is estimated to be 1 in  
63 8,000 persons (Bisgaard, Fenger, Bulow, Niebuhr, & Mohr, 1994).

64           Based on anecdotal clinical observations of behavioral and cognitive difficulties,  
65 researchers have recently become interested in examining cognitive function in FAP patients. A  
66 2010 study by researchers at the Cleveland Clinic reported that though FAP patients have IQs  
67 parallel with the general population, hearing/language-dependent verbal scores were  
68 significantly lower than those without the mutation (O'Malley et al., 2010). Preliminary data in  
69 a small sample, sibling-paired pilot study suggested that siblings who are FAP positive are more  
70 likely to suffer from behavioral and emotional problems than their healthy siblings (Azofra et  
71 al., 2016), and a prior study reported a high incidence of formal psychiatric diagnoses  
72 (especially anxiety diagnoses) in FAP adolescents (Gjone, Diseth, Fausa, Nøvik, & Heiberg,  
73 2011). The most recent investigation of neurocognitive function of FAP patients identified and  
74 characterized robust deficits in several cognitive measures (particularly long term retrieval and  
75 cognitive fluency), suggesting that APC protein plays a critical role in cognition (M. R. Cruz-  
76 Correa et al., 2020).

77           The pilot study from 2016 identified no significant differences in brain morphology  
78 comparing healthy siblings to FAP sibling counterparts, and this was the first time an FAP

79 population had been studied for neuroanatomical differences using magnetic resonance  
80 imaging (MRI) (Azofra et al., 2016). Given lack of understanding of the neurological and  
81 neurocognitive effects of this disease, the objective of the current study was to develop a more  
82 robust understanding of how FAP affects brain function. The present study employed resting  
83 state functional MRI (fMRI) to investigate potential neural substrates for cognitive deficits in a  
84 homogenous Hispanic population. To our knowledge, this is the first study of FAP patients using  
85 resting-state fMRI, which is ideally suited to the study of neurocognitive differences and related  
86 mechanisms (Hawes, Sokolowski, Ononye, & Ansari, 2019; LaClair et al., 2019; Li & King, 2019;  
87 Picó-Pérez et al., 2019; Sripada et al., 2019).

## 88 **Methods**

### 89 **MRI data acquisition**

90 Magnetic resonance images were acquired using a GE Discovery MR750 3T Scanner  
91 (General Electric Healthcare, Chicago, Illinois). An axial resting-state functional magnetic  
92 resonance imaging scan was performed on 34 individuals, which included 18 with FAP and 16  
93 healthy controls (HC). The group consisted of 16 males and 18 females, (mean age of controls:  
94 30.75; cases: 31.44 years). Axial fMRI scan time was approximately 6:15 (mm/ss). The scanner  
95 was equipped with a standard 8-channel head coil. Scan parameters: Frequency FOV (22.4),  
96 Slice thickness (3.5), Flip angle (90), Pixel size (3.5x3.5), Pulse (Gradient Echo EPI), Sequential  
97 Slice Order, Acquisition TR (2500msec).

### 98 **Participants**

99 Inclusion criteria for cases included genetically confirmed FAP (based on a mutation on  
100 the APC gene performed by commercial laboratory testing), age  $\geq 10$  years, able to assent

101 (children) and consent (adults) to participate in this study, and able to complete all  
102 neurocognitive testing. Inclusion criteria for controls included no known family history of FAP,  
103 negative clinical diagnosis of FAP based on colonoscopy (for adults), and willingness to undergo  
104 neurocognitive testing. Participants were all Spanish-speaking individuals from Puerto Rico. As  
105 education and age are correlated with IQ, cases were matched to non-FAP control individuals  
106 with regards to age ( $\pm$  three years), gender, and education (less than high school, at least high  
107 school, bachelors-degree or post-graduate education). Exclusion criteria for both cases and  
108 controls included previous diagnosis of any major psychiatric condition given the potential  
109 impact of these conditions on neurocognitive functioning, inability to sign/assent/consent study  
110 participation, or complete the neurocognitive tests.

111 Participants signed informed consent (or assent for children) prior to participation in the  
112 study and were evaluated at the Puerto Rico Clinical and Translational Research Consortium at  
113 the University of Puerto Rico (UPR) Medical Sciences Campus. The research protocol was  
114 approved by the Institutional Review Board of the UPR Medical Sciences Campus.

### 115 **Independent Component Analysis (ICA)**

116 Independent component analysis is a tool often used to separate a specific signal or  
117 “blind signal separation” from a host of signals (McKeown et al, 2010). In this study, ICA was  
118 employed to parse out the specific signals generated by fMRI and identify potential noise  
119 artifacts. Based on established practices in previous studies using FSL and ICA, a total number of  
120 30 ICs were extracted to avoid overfitting and underfitting of the dataset (Woolrich et al, 2009).  
121 Group-level ICA was performed using well-defined resting state networks (RSNs)(Smith et al,  
122 2009).

## 123 **Data Preprocessing**

124 Raw fMRI images were processed using FSL (figure 2). Slice timing correction was  
125 implemented in a bottom/up order. Within FSL, Independent Component Analysis (ICA) was  
126 used to visualize significant components. Motion was corrected for by omitting any  
127 components that displayed rapid changes in both time series and power spectra after an initial  
128 pass using FSL's MELODIC ICA tool with a subsequent second correction being done manually,  
129 removing any components that showed noise based on the recommendations of Griffanti et al,  
130 2016. Images were then concatenated and dual regressed. FSL's "randomize" function was  
131 implemented with a threshold of  $Z > 2.3$  or  $P < 0.05$  and 10,000 permutations were run to ensure  
132 significance held at the .05 level ( $n = 10,000$ ,  $0.0500 \pm 0.0044$ ). A matrix was designed within the  
133 tool to display any differences in rsFC when comparing control patients to cases (Control>Case,  
134 Case<Control). The networks presented in this paper were chosen based on commonly seen  
135 RSNs in previous studies that detailed network differences in populations with cognitive  
136 impairments.

137

138 **Table 1. Demographic characterization and cognitive data of study population.**

|                                                     | <b>FAP (n = 18)</b>     | <b>Controls (n=16)</b>  |
|-----------------------------------------------------|-------------------------|-------------------------|
| <b>Male</b>                                         | 8                       | 8                       |
| <b>Female</b>                                       | 10                      | 8                       |
| <b>Age (years)</b>                                  | 31.44 (SD 14.6 ± 3.44)  | 30.75 (SD 15.22 ± 3.80) |
| <b>Cognitive Score (Batería III Woodcock Múñez)</b> | 78.50 (SD 12.04 ± 2.83) | 96 (SD 8.58 ± 2.14)     |

139

### Data Processing Workflow

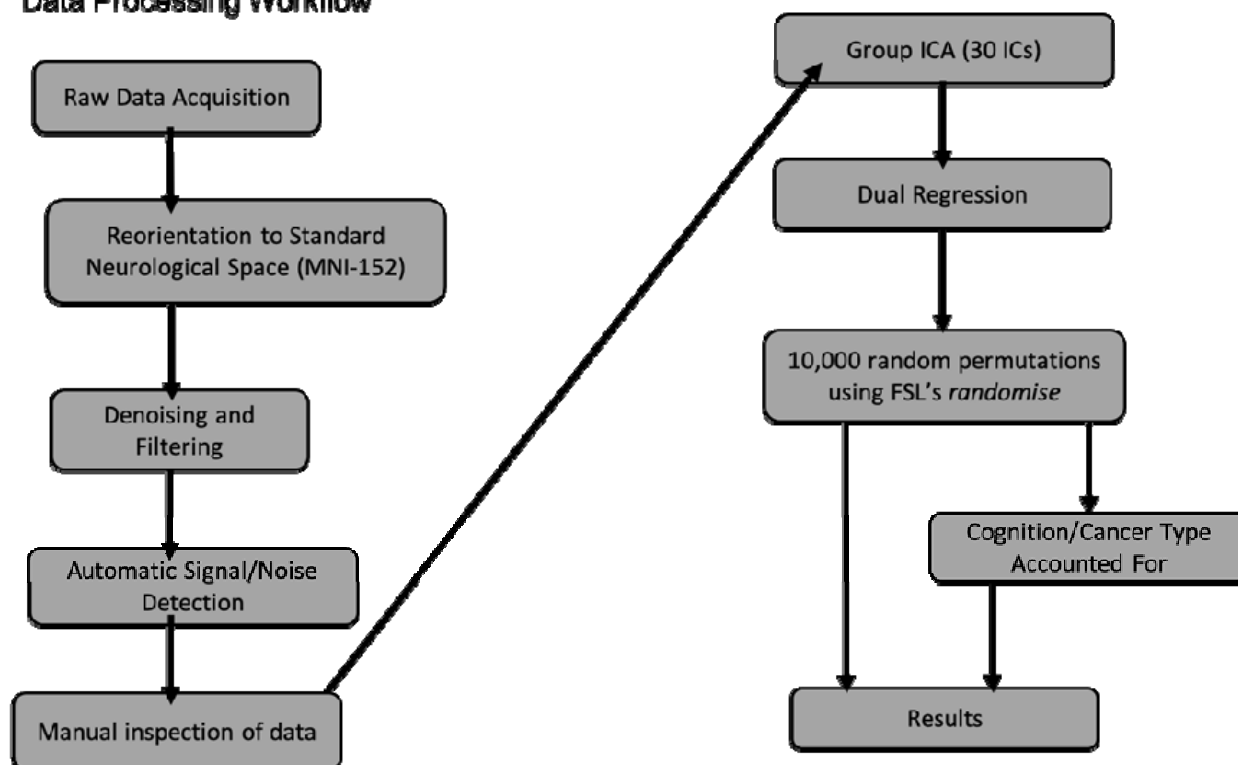

140

141

142 **Figure 1:** fMRI analysis workflow using Independent Component Analysis.

### 143 Cognitive Measures

144 Based on the cognitive assessments employed in the proof-of-concept paper (Cruz-  
145 Correa et al, 2020), an omnibus cognitive measure was created by averaging the nine cognitive  
146 domains from the Bateria III Woodcock Munez. These measures consisted of: Cognitive  
147 Efficiency, Working Memory, Long-Term Retrieval, and Executive Function, Verbal Ability,  
148 Processing Speed, Phonemic Awareness, Cognitive Fluency, and Thinking Ability. This omnibus  
149 score was then averaged between groups and introduced as a covariate into the GLM matrix of  
150 the fMRI data. The FAP group had an average cognitive score of 78.50 (SD 12.04, N=18) and the  
151 mean for the healthy controls was 96 (SD 8.58, N= 16).



152 **Results**

153 **Resting State**

154 Differences in resting state data were seen in approximately 8 well-established  
155 networks identified in previous works (Smith et al., 2009). The Left Frontoparietal Network  
156 (LFPN), Visual Medial Network, Default Mode Network (DMN), Task-Positive Network (TPN),  
157 Salience Network, Lateral Visual Network, Executive Control Network (ECN), and Auditory  
158 Network were all noted as the most identifiable networks (fig. 1). rsfMRI data was coregistered  
159 to the standard MNI152 template for visualization (Montreal Neurological Institute) (Fonov et  
160 al., 2011). Additionally, a secondary analysis of the FAP group revealed no significant  
161 differences when accounting for genotype-phenotype severity using “attenuated” and “classic”  
162 FAP as covariate groupings (M. Cruz-Correa & Giardiello, 2003; M. R. Cruz-Correa et al., 2020).

163 **Cognition as a Covariate**

164 Group differences between all nine of the cognitive variables were statistically  
165 significant both independently and when combined to form the aggregate score used in the  
166 rsfMRI analysis ( $p < 0.05$ ). When adjusting for cognition as a covariate to the rsfMRI data,  
167 significant differences were virtually eliminated, with only indications of minor differences  
168 throughout the components. This suggests a high correlation between cognitive functioning  
169 and rsfMRI findings.

170

171

172

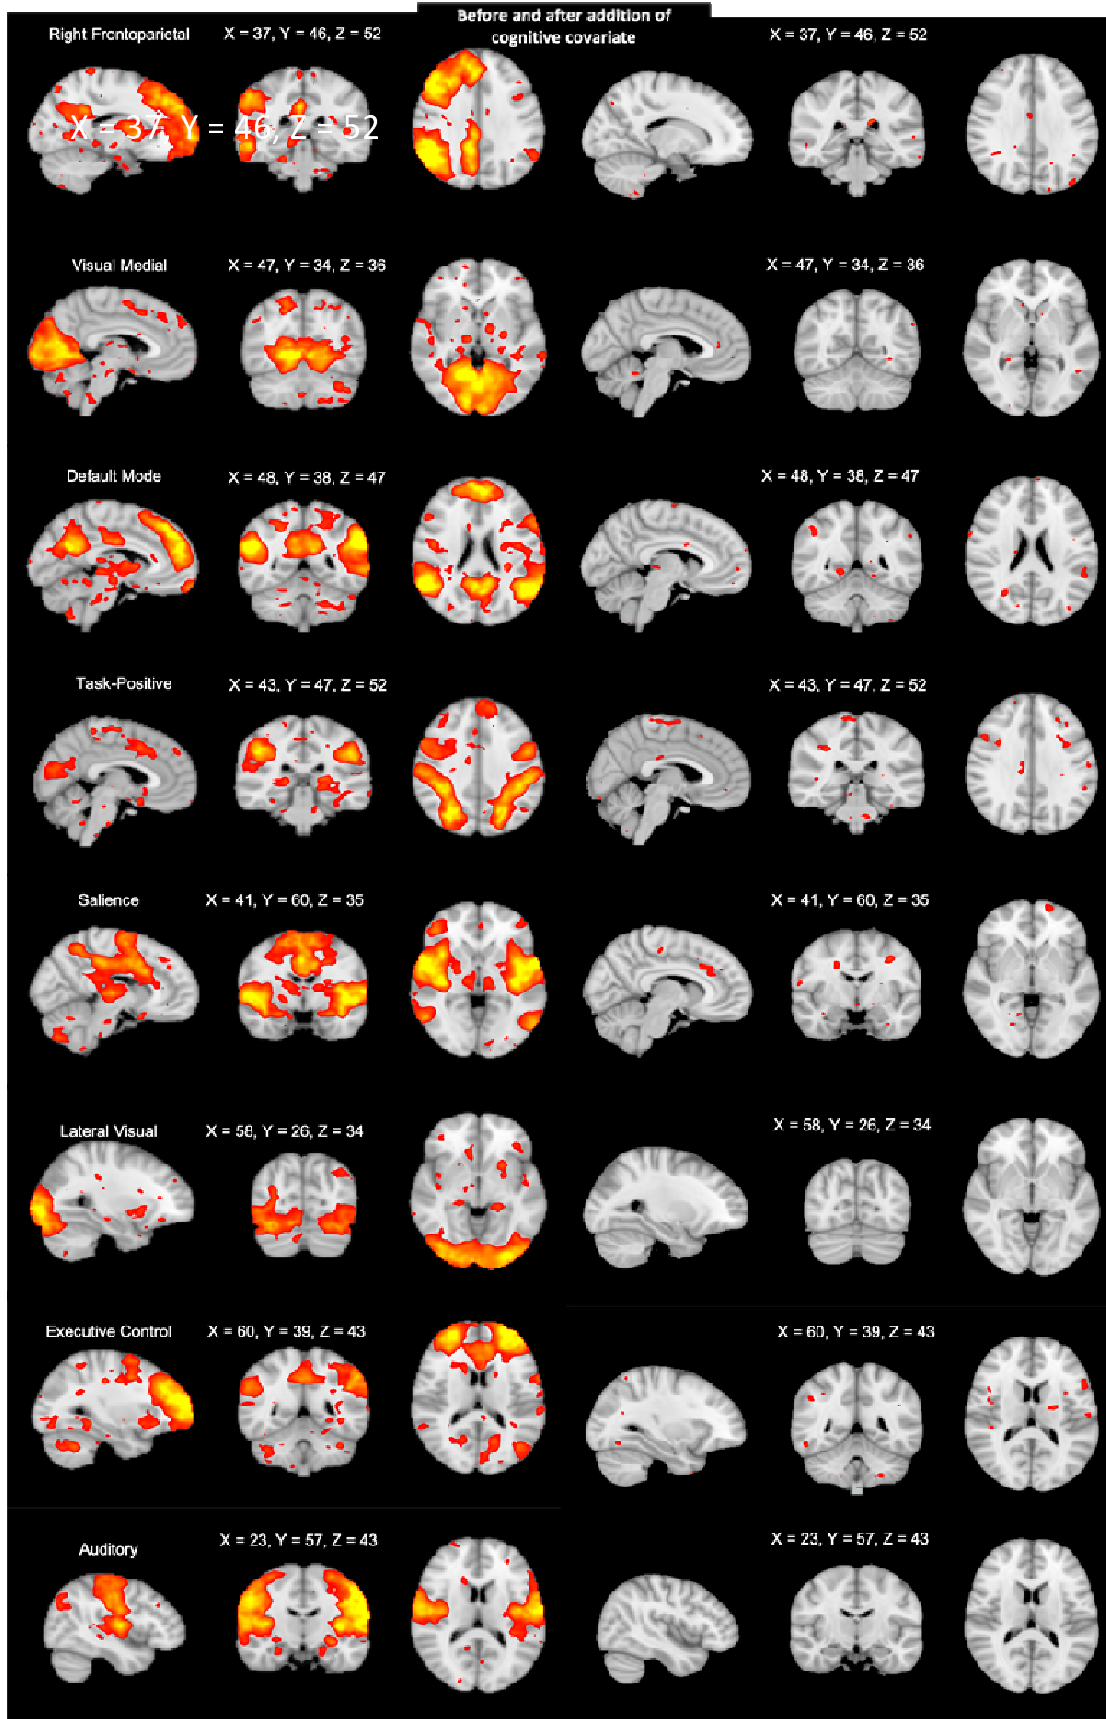

174 **Figure 2:** Activation maps of significant group differences projected onto MNI-152 standard  
175 space displaying clusters resembling 8 well-established brain networks (right, Smith et al,  
176 2019). Upon introduction of the omnibus cognitive covariate into the GLM, cluster activation  
177 was no longer present (left).

178

## 179 **Discussion**

180 The present study represents the first report of significant differences in resting state  
181 functional connectivity in FAP patients, with robust alterations in 8 brain networks which  
182 mediate cognition and sensory perception, compared to healthy controls. These neural  
183 network alterations were strongly linked to previously reported cognitive deficiency in FAP  
184 patients (Cruz-Correa et al., 2020). Observed differences in neural network cluster activation  
185 between FAP cases and healthy controls were correlated to cognition. Although this study  
186 cannot determine causality, this result indicates a strong association between cognition and  
187 brain-wide network activation. In combination with these cognitive deficits, the present data  
188 suggest that dysfunction in the APC protein affects functional neural connectivity in a broad  
189 range of cognitive and, perhaps, sensory brain networks and regions. Potential implications of  
190 the network specific findings and how they relate to previous literature in *APC* relevant topics,  
191 including depression, schizophrenia, autism, sensory perception and general cognition, are  
192 pertinent here.

193 The LFPN has been implicated as a network potentially involved in aphasias and in  
194 certain stroke patient's decrease in language function (Zhu et al., 2014). The LFPN component  
195 identified in our analysis was primarily comprised of activation in the superior temporal gyrus,

196 middle temporal gyrus, and precentral gyrus. Cognitive processing speed has been specifically  
197 linked to lateralization in FP networks (Chechlac, Gillebert, Vangkilde, Petersen, & Humphreys,  
198 2015). From an evolutionary and developmental perspective, specific and minor  
199 neuroanatomical changes in frontoparietal networks have substantial effects on cognition  
200 (Vendetti & Bunge, 2014), and developmental alterations of frontoparietal connectivity predict  
201 symptom load in high functional autism patients (Lin et al., 2019). It will be valuable to follow  
202 cognitive aging in FAP patients, as cognitive processing networks, including frontoparietal, are  
203 particularly susceptible to age related decline (Nashiro, Sakaki, Braskie, & Mather, 2017).

204         The Medial Visual Network (MVN) is essential for performing both simple and higher  
205 order visual tasks (Heine et al., 2012). This network presents as activity localized in a bi-  
206 temporal manner in the most anterior portion of the brain, centralized in the striatum  
207 (Castellazzi et al., 2014; Coppin, Grond, Hafkemeijer, Barkey Wolf, & Roos, 2018). Decreased  
208 connectivity in the MVN in schizophrenia and bipolar patients are associated with cognitive  
209 deficits (Jimenez, Riedel, Lee, Reavis, & Green, 2019). Furthermore, congenital hypertrophy of  
210 the retinal pigment epithelium, which could affect connectivity patterns in visual networks, has  
211 been observed in FAP (Laghmari & Lezrek, 2014; Traboulsi, 2005), although this was not  
212 examined in the present study. Decreased connectivity with the MVN was reported in  
213 temporal lobe epilepsy patients with cognitive deficits (H. Yang et al., 2018). It is postulated  
214 that connectivity alterations in the MVN adversely affect the processing of visual stimuli in FAP  
215 patients, resulting in decreases in processing speed and cognitive efficiency.

216         The Default Mode Network (DMN), used as a standard network in most neuroimaging  
217 studies, with its activity observed across a wide variety of tasks and pathologies (Haatveit et al.,

218 2016), was also identified in our ICA analysis of FAP patients. This network is associated with  
219 autobiographical thought, including moments of self-reflection, and often deactivates when  
220 subjects are actively completing functional paradigms (Smith et al., 2009). Gray matter volume  
221 in regions typically showing activation resembling the DMN is predictive of the progression of  
222 mild cognitive impairment (MCI) to Alzheimer's disease (AD)(Eyler et al., 2019; Petrella,  
223 Sheldon, Prince, Calhoun, & Doraiswamy, 2011; Wang et al., 2013). Late life depression is also  
224 associated with alterations in DMN connectivity (Alexopoulos et al., 2012), and the beneficial  
225 effects of mindfulness based cognitive therapy on depression symptoms (included cognitive  
226 deficits) are correlated with changes in DMN connectivity (Cernasov et al., 2019). In  
227 schizophrenia, deficits in typical activation of the prefrontal cortex (PFC) is related to specific  
228 components of the DMN (Hu et al., 2017), suggesting that future internetwork and whole brain  
229 connectivity analyses in FAP would be valuable (Pan et al., 2018; Varangis, Razlighi, Habeck,  
230 Fisher, & Stern, 2019).

231 The Task Positive Network (TPN) is generally comprised of two bilateral crescent-like  
232 clusters spanning the dorsolateral prefrontal cortex and sensorimotor areas around the  
233 temporoparietal junction (Corbetta, Kincade, & Shulman, 2002; Fox et al., 2005; Grady et al.,  
234 2010). This network is most active during attention demanding tasks and exhibits correlated  
235 fluctuations in activity with task accuracy. The TPN is commonly paired with the DMN as it is  
236 generally anticorrelated with the DMN activation, however, the DMN has similarly been shown  
237 to be active in specific tasks as well (Haatveit et al, 2016). Changes in TPN interaction with the  
238 DMN have been implicated in adverse cognitive patterns in depression, such as rumination  
239 (Hamilton et al., 2011). In a study of the performance of young and old participants in visual

240 cognitive tasks, changes linked to decreased neurocognitive efficiency were observed in both  
241 the DMN and TPN (Grady et al., 2010). The TPN is also altered in patients with mild cognitive  
242 impairments (MCI) supporting the hypothesis that increased TPN activity may be a  
243 compensatory response to neurodegeneration (Melrose et al., 2018). Changes in the TPN  
244 and/or how it interacts with the DMN may mediate attention related aspects of cognitive  
245 deficits in FAP patients.

246         The major regions of the salience network (SN) include the amygdala, substantia nigra,  
247 thalamus, and hypothalamus (Seeley et al., 2007). This network plays a role in processing of  
248 rewards, cognitive control, and behavior (Ham, Leff, de Boissezon, Joffe, & Sharp, 2013). The SN  
249 is activated in the presence of particularly salient stimuli, and this network may be correlated  
250 with feelings of anxiety when assessed pre-MRI scan (Seeley et al., 2007). Typical internetwork  
251 connectivity patterns with the SN are disrupted in MCI, and the degree of disruption is  
252 associated with the degree of overall cognitive deficit (Chand, Wu, Hajjar, & Qiu, 2017). Similar  
253 to studies of the TPN, this role of SN in cognition was not limited to MCI, and the SN may be  
254 another region with a key role in age related cognitive changes (La Corte et al., 2016).  
255 Hyperconnectivity within the SN may be a defining feature of autism spectrum disorders (Uddin  
256 et al., 2013), and atypical connectivity between the DMN and SN suggest similar neural  
257 mechanisms in ASD and schizophrenia (Chen et al., 2017). While additional longitudinal data  
258 are needed, FAP mediated changes in the SN may be the result of abnormal  
259 neurodevelopmental and/or premature age related alterations.

260         The lateral visual network (LVN) has been attributed to helping to facilitate  
261 sensorimotor processes (Castellazzi et al., 2014). It commonly presents as activation in the

262 occipito-temporal and parietal regions and is associated with the observation of highly  
263 appealing visual stimuli (Belfi et al., 2019). A study of late life depression, which often involves  
264 cognitive deficits, reported significant alterations in visual networks (Eyre et al., 2016). In  
265 addition, both major depression and schizophrenia patients exhibit differences in visual  
266 network connectivity compared to healthy controls (Wu et al., 2017). Hence, FAP related  
267 changes in both the lateral and medial visual networks may adversely affect the processing and  
268 response to visual stimuli.

269         The Executive Control Network (ECN) is comprised of fronto-localized activation, with  
270 regions including the anterior cingulate and paracingulate (Zhao, Swati, Metmer, Sang, & Lu,  
271 2019). This network is important in facilitating executive function. One study examining  
272 cirrhotic patients (liver disease) showed that patients performed significantly worse than  
273 controls on a Stroop Task as well as the performance showing a significant correlation with  
274 disrupted ECN connectivity (Yang, Chen, Chen, & Lin, 2018). Similarly, this network has recently  
275 been implicated in studies of major depressive disorder, with increased activation to specific  
276 network-related areas (Zhao et al., 2019). A lack of segregation between ECN and DMN  
277 activation was correlated with decreased processing speed in a longitudinal study of healthy  
278 older adults (Ng, Lo, Lim, Chee, & Zhou, 2016). As individuals age, the functional specialization  
279 of these two networks is attenuated. Decreased network segregation is implicated in major  
280 depression, where connectivity with the ECN and between the ECN and DMN is disrupted  
281 compared to non-depressed controls, potentially representing compensatory cognitive  
282 mechanisms (Albert, Potter, Boyd, Kang, & Taylor, 2019). Future studies of the mechanisms

283 mediating cognitive deficits in FAP patients should focus on the role of the ECN, its functional  
284 connections with the DMN, and potential moderating factors, such as depression.

285         The auditory network presents as activation in the insula, auditory cortices, cingulate,  
286 and occipital cortices (Maudoux et al., 2012), and is primarily responsible for processing and  
287 parsing auditory stimuli. This network has been investigated for its potential involvement in  
288 processing fearful stimuli, with emotional “hubs” being associated with its activity (Koelsch,  
289 Skouras, & Lohmann, 2018). Auditory deficits have been reported in FAP patients in the  
290 absence of significant differences in IQ (O'Malley et al., 2010), although another investigation  
291 did not observe significant impairments (Jones et al., 2010). The APC protein is essential for  
292 cellular processes related to cochlear sensitivity, and since these are common cellular  
293 processes, it is suggested that APC mediates synaptic maturation in wide variety of tissues  
294 (Hickman, Liberman, & Jacob, 2015). It is possible that auditory deficits in FAP patients could  
295 be mechanistically mediated by effects at the ear and/or auditory processing nuclei.

## 296 **Limitations**

297         Main limitations of this study include the use of an aggregate cognitive score due to  
298 small sample size, the presence of only one imaging time point, and the lack of structural data.  
299 While the use of an aggregate cognitive score precludes associations between specific types of  
300 cognition and network connectivity changes, this was justified based on the consistency across  
301 cognitive scores, the small sample size, and the focus on general conclusions strongly supported  
302 by the imaging data. Future studies would benefit from additional data points and the inclusion  
303 of structural MRI data to investigate the etiology of these cognitive deficits in FAP patients in  
304 early through late life. Although structural changes are likely given the role of APC in



305 neurodevelopment and structural-functional relationships in cognition, the current manuscript  
306 can only speculate on these changes due to the focus on functional data.

### 307 **Conclusion**

308 Resting state functional connectivity in FAP patients is substantially disrupted in a broad  
309 range of networks critical to cognition and visual and auditory stimuli processing. These  
310 alterations in connectivity are strongly associated with overall cognitive deficits in these  
311 individuals. Taken together, the APC gene appears to play a critical role in neurocognitive  
312 function and sensory processing, and could negatively affect development through changes in  
313 neural connectivity. Future studies should characterize changes in neurocognition and auditory  
314 and visual sensation and processing throughout the lifespan to characterize the progression of  
315 related deficits in FAP patients. The role of the APC protein in other neurodegenerative  
316 disorders, such as autism and schizophrenia, is warranted.

317

318

### 319 **Financial Disclosure**

320 The authors have no financial conflicts of interest to report.

321

322

323

324

325

326

327 **References**

- 328
- 329 Albert, K. M., Potter, G. G., Boyd, B. D., Kang, H., & Taylor, W. D. (2019). Brain network  
330 functional connectivity and cognitive performance in major depressive disorder. *Journal*  
331 *of Psychiatric Research, 110*, 51-56.  
332 doi:<https://doi.org/10.1016/j.jpsychires.2018.11.020>
- 333 Alexopoulos, G. S., Hoptman, M. J., Kanellopoulos, D., Murphy, C. F., Lim, K. O., & Gunning, F.  
334 M. (2012). Functional connectivity in the cognitive control network and the default  
335 mode network in late-life depression. *Journal of Affective Disorders, 139*(1), 56-65.  
336 doi:<https://doi.org/10.1016/j.jad.2011.12.002>
- 337 Azofra, A. S., Kidambi, T. D., Jeremy, R. J., Conrad, P., Blanco, A., Myers, M., . . . Terdiman, J. P.  
338 (2016). Differences in neuropsychological and behavioral parameters and brain  
339 structure in patients with familial adenomatous polyposis: a sibling-paired study.  
340 *Hereditary Cancer in Clinical Practice, 14*, 20-20. doi:10.1186/s13053-016-0060-7
- 341 Belfi, A. M., Vessel, E. A., Brielmann, A., Isik, A. I., Chatterjee, A., Leder, H., . . . Starr, G. G.  
342 (2019). Dynamics of aesthetic experience are reflected in the default-mode network.  
343 *NeuroImage, 188*, 584-597. doi:10.1016/j.neuroimage.2018.12.017
- 344 Bisgaard, M. L., Fenger, K., Bulow, S., Niebuhr, E., & Mohr, J. (1994). Familial adenomatous  
345 polyposis (FAP): frequency, penetrance, and mutation rate. *Hum Mutat, 3*(2), 121-125.  
346 doi:10.1002/humu.1380030206
- 347 Castellazzi, G., Palesi, F., Casali, S., Vitali, P., Sinforiani, E., Wheeler-Kingshott, C. A., & D'Angelo,  
348 E. (2014). A comprehensive assessment of resting state networks: bidirectional  
349 modification of functional integrity in cerebro-cerebellar networks in dementia. *Front*  
350 *Neurosci, 8*, 223. doi:10.3389/fnins.2014.00223
- 351 Cernasov, P., Greene, R., Kinard, J., Halverson, T., Lowery, S., McLamb, M., . . . Dichter, G.  
352 (2019). Attenuated Default Mode Network Functional Connectivity is Associated With  
353 Improvement in Depressive Symptoms Following Mindfulness-Based Cognitive Therapy  
354 in a Transdiagnostic Anhedonic Sample. *Biological Psychiatry, 85*(10), S158-S159.  
355 doi:10.1016/j.biopsych.2019.03.401
- 356 Chand, G. B., Wu, J., Hajjar, I., & Qiu, D. (2017). Interactions of the Salience Network and Its  
357 Subsystems with the Default-Mode and the Central-Executive Networks in Normal Aging  
358 and Mild Cognitive Impairment. *Brain Connectivity, 7*(7), 401-412.  
359 doi:10.1089/brain.2017.0509
- 360 Chechlacz, M., Gillebert, C. R., Vangkilde, S. A., Petersen, A., & Humphreys, G. W. (2015).  
361 Structural Variability within Frontoparietal Networks and Individual Differences in  
362 Attentional Functions: An Approach Using the Theory of Visual Attention. *The Journal of*  
363 *Neuroscience, 35*(30), 10647. doi:10.1523/JNEUROSCI.0210-15.2015
- 364 Chen, H., Uddin, L. Q., Duan, X., Zheng, J., Long, Z., Zhang, Y., . . . Chen, H. (2017). Shared  
365 atypical default mode and salience network functional connectivity between autism and  
366 schizophrenia. *Autism Res, 10*(11), 1776-1786. doi:10.1002/aur.1834
- 367 Coppen, E. M., Grond, J. V., Hafkemeijer, A., Barkey Wolf, J. J. H., & Roos, R. A. C. (2018).  
368 Structural and functional changes of the visual cortex in early Huntington's disease. *Hum*  
369 *Brain Mapp, 39*(12), 4776-4786. doi:10.1002/hbm.24322

- 370 Corbetta, M., Kincade, J. M., & Shulman, G. L. (2002). Neural systems for visual orienting and  
371 their relationships to spatial working memory. *J Cogn Neurosci*, *14*(3), 508-523.  
372 doi:10.1162/089892902317362029
- 373 Cruz-Correa, M., & Giardiello, F. M. (2003). Familial adenomatous polyposis. *Gastrointest*  
374 *Endosc*, *58*(6), 885-894. doi:10.1016/s0016-5107(03)02336-8
- 375 Cruz-Correa, M. R., Sala, A. C., Cintrón, B., Hernández, J., Olivera, M., Cora, A., . . . Hooper, S. R.  
376 (2020). Ubiquitous neurocognitive dysfunction in familial adenomatous polyposis: proof-  
377 of-concept of the role of APC protein in neurocognitive function. *Hereditary Cancer in*  
378 *Clinical Practice*, *18*(1), 4. doi:10.1186/s13053-020-0135-3
- 379 Eyler, L. T., Elman, J. A., Hatton, S. N., Gough, S., Mischel, A. K., Hagler, D. J., . . . Kremen, W. S.  
380 (2019). Resting State Abnormalities of the Default Mode Network in Mild Cognitive  
381 Impairment: A Systematic Review and Meta-Analysis. *Journal of Alzheimer's Disease*, *70*,  
382 107-120. doi:10.3233/JAD-180847
- 383 Eyre, H. A., Yang, H., Leaver, A. M., Van Dyk, K., Siddarth, P., Cyr, N. S., . . . Lavretsky, H. (2016).  
384 Altered resting-state functional connectivity in late-life depression: A cross-sectional  
385 study. *J Affect Disord*, *189*, 126-133. doi:10.1016/j.jad.2015.09.011
- 386 Fearnhead, N. S., Britton, M. P., & Bodmer, W. F. (2001). The ABC of APC. *Human Molecular*  
387 *Genetics*, *10*(7), 721-733. doi:10.1093/hmg/10.7.721
- 388 Fonov, V., Evans, A. C., Botteron, K., Almlj, C. R., McKinstry, R. C., & Collins, D. L. (2011).  
389 Unbiased average age-appropriate atlases for pediatric studies. *NeuroImage*, *54*(1), 313-  
390 327. doi:<https://doi.org/10.1016/j.neuroimage.2010.07.033>
- 391 Fox, M. D., Snyder, A. Z., Vincent, J. L., Corbetta, M., Van Essen, D. C., & Raichle, M. E. (2005).  
392 The human brain is intrinsically organized into dynamic, anticorrelated functional  
393 networks. *Proceedings of the National Academy of Sciences of the United States of*  
394 *America*, *102*(27), 9673. doi:10.1073/pnas.0504136102
- 395 Gjone, H., Diseth, T. H., Fausa, O., Nøvik, T. S., & Heiberg, A. (2011). Familial adenomatous  
396 polyposis: mental health, psychosocial functioning and reactions to genetic risk in  
397 adolescents. *Clin Genet*, *79*(1), 35-43. doi:10.1111/j.1399-0004.2010.01534.x
- 398 Grady, C. L., Protzner, A. B., Kovacevic, N., Strother, S. C., Afshin-Pour, B., Wojtowicz, M., . . .  
399 McIntosh, A. R. (2010). A multivariate analysis of age-related differences in default  
400 mode and task-positive networks across multiple cognitive domains. *Cerebral cortex*  
401 *(New York, N.Y. : 1991)*, *20*(6), 1432-1447. doi:10.1093/cercor/bhp207
- 402 Haatveit, B., Jensen, J., Alnaes, D., Kaufmann, T., Brandt, C. L., Thoresen, C., . . . Westlye, L. T.  
403 (2016). Reduced load-dependent default mode network deactivation across executive  
404 tasks in schizophrenia spectrum disorders. *Neuroimage Clin*, *12*, 389-396.  
405 doi:10.1016/j.nicl.2016.08.012
- 406 Ham, T., Leff, A., de Boissezon, X., Joffe, A., & Sharp, D. J. (2013). Cognitive control and the  
407 salience network: an investigation of error processing and effective connectivity. *The*  
408 *Journal of neuroscience : the official journal of the Society for Neuroscience*, *33*(16),  
409 7091-7098. doi:10.1523/JNEUROSCI.4692-12.2013
- 410 Hamilton, J. P., Furman, D. J., Chang, C., Thomason, M. E., Dennis, E., & Gotlib, I. H. (2011).  
411 Default-Mode and Task-Positive Network Activity in Major Depressive Disorder:  
412 Implications for Adaptive and Maladaptive Rumination. *Biological Psychiatry*, *70*(4), 327-  
413 333. doi:<https://doi.org/10.1016/j.biopsych.2011.02.003>

- 414 Hawes, Z., Sokolowski, H. M., Ononye, C. B., & Ansari, D. (2019). Neural underpinnings of  
415 numerical and spatial cognition: An fMRI meta-analysis of brain regions associated with  
416 symbolic number, arithmetic, and mental rotation. *Neuroscience & Biobehavioral*  
417 *Reviews*, *103*, 316-336. doi:<https://doi.org/10.1016/j.neubiorev.2019.05.007>
- 418 Heine, L., Soddu, A., Gomez, F., Vanhaudenhuyse, A., Tshibanda, L., Thonnard, M., . . . Demertzi,  
419 A. (2012). Resting state networks and consciousness: alterations of multiple resting  
420 state network connectivity in physiological, pharmacological, and pathological  
421 consciousness States. *Front Psychol*, *3*, 295. doi:10.3389/fpsyg.2012.00295
- 422 Hickman, T. T., Liberman, M. C., & Jacob, M. H. (2015). Adenomatous Polyposis Coli Protein  
423 Deletion in Efferent Olivocochlear Neurons Perturbs Afferent Synaptic Maturation and  
424 Reduces the Dynamic Range of Hearing. *The Journal of Neuroscience*, *35*(24), 9236.  
425 doi:10.1523/JNEUROSCI.4384-14.2015
- 426 Hu, M.-L., Zong, X.-F., Mann, J. J., Zheng, J.-J., Liao, Y.-H., Li, Z.-C., . . . Tang, J.-S. (2017). A Review  
427 of the Functional and Anatomical Default Mode Network in Schizophrenia. *Neuroscience*  
428 *bulletin*, *33*(1), 73-84. doi:10.1007/s12264-016-0090-1
- 429 Jimenez, A. M., Riedel, P., Lee, J., Reavis, E. A., & Green, M. F. (2019). Linking resting-state  
430 networks and social cognition in schizophrenia and bipolar disorder. *Hum Brain Mapp*,  
431 *40*(16), 4703-4715. doi:10.1002/hbm.24731
- 432 Jones, S. E., Joice, P., Cochrane, L., Thoresen, I., Quyn, A., & Nahke, I. (2010). Is familial  
433 adenomatous polyposis associated with sensorineural hearing loss? *Int J Audiol*, *49*(10),  
434 762-764. doi:10.3109/14992027.2010.491098
- 435 Koelsch, S., Skouras, S., & Lohmann, G. (2018). The auditory cortex hosts network nodes  
436 influential for emotion processing: An fMRI study on music-evoked fear and joy. *PLoS*  
437 *ONE*, *13*(1), e0190057. doi:10.1371/journal.pone.0190057
- 438 La Corte, V., Sperduti, M., Malherbe, C., Vialatte, F., Lion, S., Gallarda, T., . . . Piolino, P. (2016).  
439 Cognitive Decline and Reorganization of Functional Connectivity in Healthy Aging: The  
440 Pivotal Role of the Salience Network in the Prediction of Age and Cognitive  
441 Performances. *Frontiers in Aging Neuroscience*, *8*(204). doi:10.3389/fnagi.2016.00204
- 442 LaClair, M., Febo, M., Nephew, B., Gervais, N. J., Poirier, G., Workman, K., . . . Lacreuse, A.  
443 (2019). Sex Differences in Cognitive Flexibility and Resting Brain Networks in Middle-  
444 Aged Marmosets. *eneuro*, *6*(4), ENEURO.0154-0119.2019. doi:10.1523/ENEURO.0154-  
445 19.2019
- 446 Laghmari, M., & Lezrek, O. (2014). Congenital hypertrophy of the retinal pigment epithelium in  
447 Gardner's syndrome. *The Pan African medical journal*, *19*, 164-164.  
448 doi:10.11604/pamj.2014.19.164.4518
- 449 Li, A. W. Y., & King, J. (2019). Spatial memory and navigation in ageing: A systematic review of  
450 MRI and fMRI studies in healthy participants. *Neuroscience & Biobehavioral Reviews*,  
451 *103*, 33-49. doi:<https://doi.org/10.1016/j.neubiorev.2019.05.005>
- 452 Lin, H.-Y., Perry, A., Cocchi, L., Roberts, J. A., Tseng, W.-Y. I., Breakspear, M., & Gau, S. S.-F.  
453 (2019). Development of frontoparietal connectivity predicts longitudinal symptom  
454 changes in young people with autism spectrum disorder. *Translational Psychiatry*, *9*(1),  
455 86. doi:10.1038/s41398-019-0418-5

- 456 Maudoux, A., Lefebvre, P., Cabay, J. E., Demertzi, A., Vanhaudenhuyse, A., Laureys, S., & Soddu,  
457 A. (2012). Auditory resting-state network connectivity in tinnitus: a functional MRI  
458 study. *PLoS ONE*, 7(5), e36222. doi:10.1371/journal.pone.0036222
- 459 Melrose, R. J., Jimenez, A. M., Riskin-Jones, H., Weissberger, G., Veliz, J., Hasratian, A. S., . . .  
460 Sultzer, D. L. (2018). Alterations to task positive and task negative networks during  
461 executive functioning in Mild Cognitive Impairment. *NeuroImage: Clinical*, 19, 970-981.  
462 doi:<https://doi.org/10.1016/j.nicl.2018.06.014>
- 463 Nashiro, K., Sakaki, M., Braskie, M. N., & Mather, M. (2017). Resting-state networks associated  
464 with cognitive processing show more age-related decline than those associated with  
465 emotional processing. *Neurobiology of Aging*, 54, 152-162.  
466 doi:<https://doi.org/10.1016/j.neurobiolaging.2017.03.003>
- 467 Ng, K. K., Lo, J. C., Lim, J. K. W., Chee, M. W. L., & Zhou, J. (2016). Reduced functional  
468 segregation between the default mode network and the executive control network in  
469 healthy older adults: A longitudinal study. *NeuroImage*, 133, 321-330.  
470 doi:<https://doi.org/10.1016/j.neuroimage.2016.03.029>
- 471 O'Malley, M., LaGuardia, L., Naugle, R., Gensur, C., Hammel, J., Church, J., & Burke, C. (2010).  
472 Audiology and Familial Adenomatous Polyposis: do you hear what I hear? *Hereditary*  
473 *Cancer in Clinical Practice*, 8(Suppl 1), P14-P14. doi:10.1186/1897-4287-8-S1-P14
- 474 Pan, J., Zhan, L., Hu, C., Yang, J., Wang, C., Gu, L., . . . Wu, X. (2018). Emotion Regulation and  
475 Complex Brain Networks: Association Between Expressive Suppression and Efficiency in  
476 the Fronto-Parietal Network and Default-Mode Network. *Frontiers in Human*  
477 *Neuroscience*, 12(70). doi:10.3389/fnhum.2018.00070
- 478 Petrella, J. R., Sheldon, F. C., Prince, S. E., Calhoun, V. D., & Doraiswamy, P. M. (2011). Default  
479 mode network connectivity in stable vs progressive mild cognitive impairment.  
480 *Neurology*, 76(6), 511-517. doi:10.1212/WNL.0b013e31820af94e
- 481 Picó-Pérez, M., Alemany-Navarro, M., Dunsmoor, J. E., Radua, J., Albajes-Eizagirre, A., Vervliet,  
482 B., . . . Fullana, M. A. (2019). Common and distinct neural correlates of fear extinction  
483 and cognitive reappraisal: A meta-analysis of fMRI studies. *Neuroscience &*  
484 *Biobehavioral Reviews*, 104, 102-115.  
485 doi:<https://doi.org/10.1016/j.neubiorev.2019.06.029>
- 486 Seeley, W. W., Menon, V., Schatzberg, A. F., Keller, J., Glover, G. H., Kenna, H., . . . Greicius, M.  
487 D. (2007). Dissociable intrinsic connectivity networks for salience processing and  
488 executive control. *J Neurosci*, 27(9), 2349-2356. doi:10.1523/jneurosci.5587-06.2007
- 489 Smith, S. M., Fox, P. T., Miller, K. L., Glahn, D. C., Fox, P. M., Mackay, C. E., . . . Beckmann, C. F.  
490 (2009). Correspondence of the brain's functional architecture during activation and rest.  
491 *Proceedings of the National Academy of Sciences*, 106(31), 13040.  
492 doi:10.1073/pnas.0905267106
- 493 Sripada, C., Rutherford, S., Angstadt, M., Thompson, W. K., Luciana, M., Weigard, A., . . .  
494 Heitzeg, M. (2019). Prediction of neurocognition in youth from resting state fMRI.  
495 *Molecular Psychiatry*. doi:10.1038/s41380-019-0481-6
- 496 Traboulsi, E. I. (2005). Ocular manifestations of familial adenomatous polyposis (Gardner  
497 syndrome). *Ophthalmol Clin North Am*, 18(1), 163-166, x. doi:10.1016/j.ohc.2004.08.003
- 498 Uddin, L. Q., Supekar, K., Lynch, C. J., Khouzam, A., Phillips, J., Feinstein, C., . . . Menon, V.  
499 (2013). Salience Network–Based Classification and Prediction of Symptom Severity in

- 500 Children With Autism. *JAMA Psychiatry*, 70(8), 869-879.  
501 doi:10.1001/jamapsychiatry.2013.104
- 502 Varangis, E., Razlighi, Q., Habeck, C. G., Fisher, Z., & Stern, Y. (2019). Between-network  
503 Functional Connectivity Is Modified by Age and Cognitive Task Domain. *Journal of*  
504 *Cognitive Neuroscience*, 31(4), 607-622. doi:10.1162/jocn\_a\_01368
- 505 Vendetti, Michael S., & Bunge, Silvia A. (2014). Evolutionary and Developmental Changes in the  
506 Lateral Frontoparietal Network: A Little Goes a Long Way for Higher-Level Cognition.  
507 *Neuron*, 84(5), 906-917. doi:<https://doi.org/10.1016/j.neuron.2014.09.035>
- 508 Wang, Y., Risacher, S. L., West, J. D., McDonald, B. C., MaGee, T. R., Farlow, M. R., . . . Saykin, A.  
509 J. (2013). Altered Default Mode Network Connectivity in Older Adults with Cognitive  
510 Complaints and Amnesic Mild Cognitive Impairment. *Journal of Alzheimer's Disease*, 35,  
511 751-760. doi:10.3233/JAD-130080
- 512 Wu, X.-j., Zeng, L.-L., Shen, H., Yuan, L., Qin, J., Zhang, P., & Hu, D. (2017). Functional network  
513 connectivity alterations in schizophrenia and depression. *Psychiatry Research:*  
514 *Neuroimaging*, 263, 113-120. doi:<https://doi.org/10.1016/j.psychresns.2017.03.012>
- 515 Yang, H., Zhang, C., Liu, C., Yu, T., Zhang, G., Chen, N., & Li, K. (2018). Brain network alteration in  
516 patients with temporal lobe epilepsy with cognitive impairment. *Epilepsy & Behavior*,  
517 81, 41-48. doi:<https://doi.org/10.1016/j.yebeh.2018.01.024>
- 518 Yang, Z.-T., Chen, H.-J., Chen, Q.-F., & Lin, H. (2018). Disrupted Brain Intrinsic Networks and  
519 Executive Dysfunction in Cirrhotic Patients without Overt Hepatic Encephalopathy.  
520 *Frontiers in neurology*, 9, 14-14. doi:10.3389/fneur.2018.00014
- 521 Zhao, Q., Swati, Z. N. K., Metmer, H., Sang, X., & Lu, J. (2019). Investigating executive control  
522 network and default mode network dysfunction in major depressive disorder.  
523 *Neuroscience Letters*, 701, 154-161. doi:<https://doi.org/10.1016/j.neulet.2019.02.045>
- 524 Zhu, D., Chang, J., Freeman, S., Tan, Z., Xiao, J., Gao, Y., & Kong, J. (2014). Changes of functional  
525 connectivity in the left frontoparietal network following aphasic stroke. *Frontiers in*  
526 *Behavioral Neuroscience*, 8, 167-167. doi:10.3389/fnbeh.2014.00167

527

528

529 **Funding:** Supported by Award Number 2U54MD007587 from the National Institute on Minority  
530 Health and Health Disparities and National Institute of Allergy and Infectious Diseases and the  
531 Investigational Fund of the University of Puerto Rico Vice Presidency for Research.  
532
